# Supplementary material for: Scanning Electrochemical Microscopy-Somatic Cell Count as a Method for Diagnosis of Bovine Mastitis
Source: MDPI journal article supplement (doi:10.3390/biology11040549), 2022-04-01
Supplement: s1 [file s1]

**Figure S1**

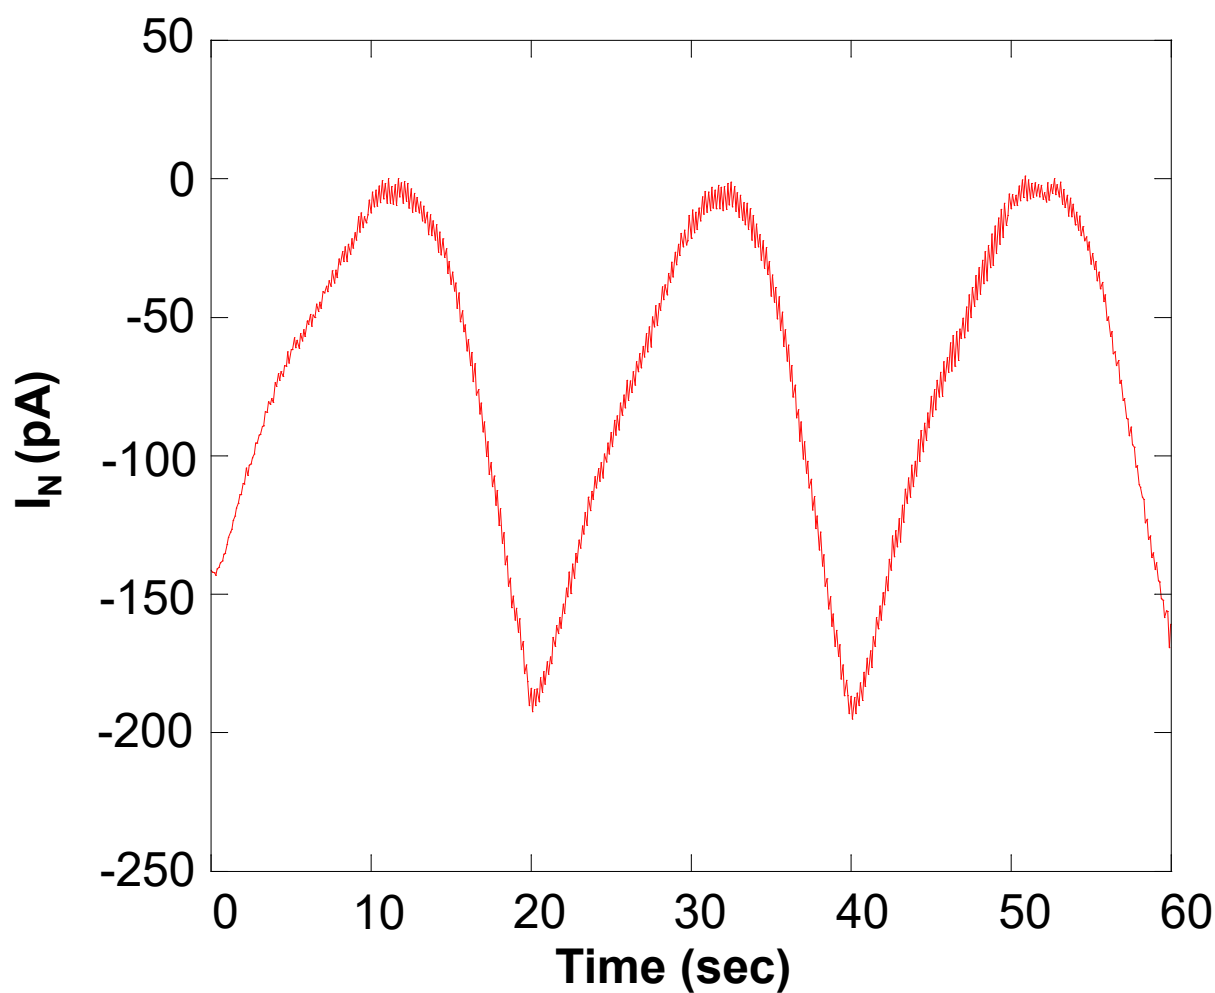

**Figure S1:** The oxygen reduction current from somatic cells in the milk cell chip filtered using nanofibers and without centrifugation. Approximately 0.27 g of nanofibers was inserted into a 10 mL disposable syringe and 5 mL milk ( $6.5 \times 10^6$  cells/mL) was filtered through a syringe. SECM-SCC was performed in the same manner as in section 2.5.
